# Supplementary material for: A hybrid sol–gel synthesis of mesostructured SiC with tunable porosity and its application as a support for propane oxidative dehydrogenation
Source: Royal Society of Chemistry journal article supplement (doi:10.1039/c0cp02895a), 2011-01-01
Supplement: c0cp02895a.pdf [file c0cp02895a.pdf]

**Electronic Supporting Information for**  
**A Hybrid Sol-gel Synthesis of Mesoporous SiC with Tunable**  
**Porosity and its Application as a Support for Propane Oxidative**  
**Dehydrogenation**

Jie Xu<sup>a</sup>, Yong-Mei Liu<sup>b</sup>, Bing Xue<sup>a</sup>, Yong-Xin Li<sup>a,\*</sup>, Yong Cao<sup>b,\*</sup>, Kang-Nian Fan<sup>b</sup>  
<sup>a</sup>*College of Chemistry and Chemical Engineering, Changzhou University, Gehu Road  
1, Changzhou, Jiangsu 213164, P. R. China*  
<sup>b</sup>*Shanghai Key Laboratory of Molecular Catalysis and Innovative Materials,  
Department of Chemistry, Fudan University, Shanghai 200433, P. R. China*

**Fig. S1**

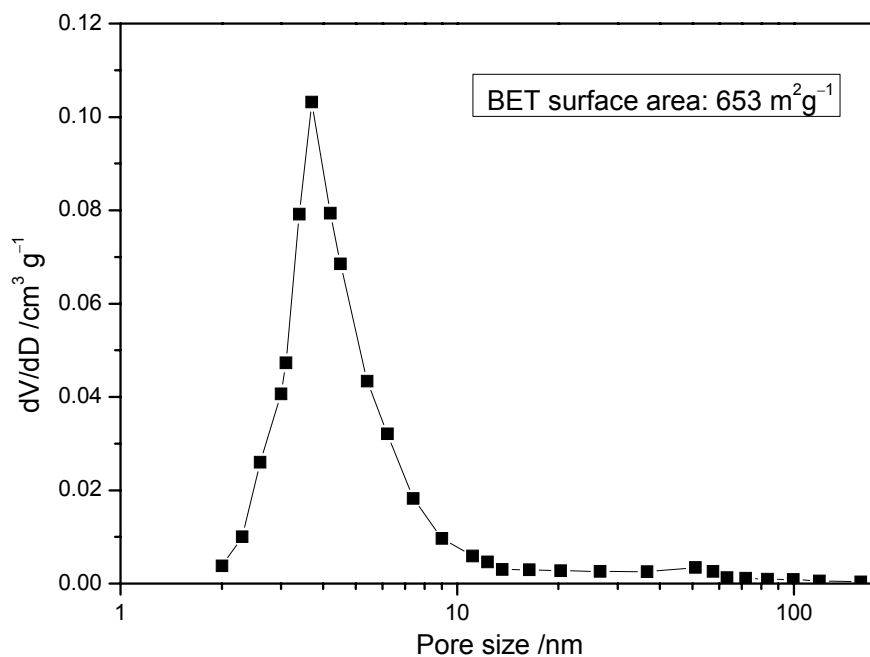

**Table S1**

| Catalyst                | Surface area<br>$/\text{m}^2 \cdot \text{g}^{-1}$ | Pore volume<br>$/\text{cm}^3 \cdot \text{g}^{-1}$ | V-content<br>/% | Reaction temperature<br>$/^\circ\text{C}$ | C ( $\text{C}_3\text{H}_8$ ) <sup>c</sup><br>/% | S ( $\text{C}_3\text{H}_6$ ) <sup>c</sup><br>/% | Reference |
|-------------------------|---------------------------------------------------|---------------------------------------------------|-----------------|-------------------------------------------|-------------------------------------------------|-------------------------------------------------|-----------|
| 1.5V-SiC-C <sub>8</sub> | 345 <sup>a</sup>                                  | 0.92 <sup>a</sup>                                 | 1.5             | 600                                       | 32.5                                            | 62.1                                            | This work |
| 2V/MCM                  | 952 <sup>b</sup>                                  | n/a                                               | 2.3             | 550                                       | 11.1                                            | 61.6                                            | [1]       |
| 1.8V-SBA-15             | 559 <sup>b</sup>                                  | 0.99 <sup>b</sup>                                 | 1.8             | 600                                       | 37.4                                            | 53.1                                            | [2]       |
| 1VITQ6                  | 594 <sup>b</sup>                                  | n/a                                               | 1.4             | 550                                       | 21.1                                            | 53.1                                            | [3]       |

<sup>a</sup> Surface area or pore volume of catalytic support.

<sup>b</sup> Surface area or pore volume of catalyst.

<sup>c</sup> The best conversion or selectivity obtained.

[1] B. Solsona, T. Blasco, J. M. L. Nieto, M. L. Pena, F. Rey and A. Vidal-Moya, *J. Catal.*, 2001, **203**, 443.

[2] Y. M. Liu, Y. Cao, N. Yi, W. L. Feng, W. L. Dai, S. R. Yan, H. Y. He and K. N. Fan, *J. Catal.*, 2004, **224**, 417.

[3] B. Solsona, J. M. L. Nieto and U. Diaz, *Micropor. Mesopor. Mater.*, 2006, **94**, 339.
